# Supplementary material for: Continue, adjust, or stop antipsychotic medication: developing and user testing an encounter decision aid for people with first-episode and long-term psychosis
Source: Springer Nature journal article supplement (doi:10.1186/s12888-018-1707-x), 2018-05-22
Supplement: MOESM1 [file 15782140]

# Antipsychotic medication: continue, adjust, or stop?

## Evidence document

### What does this involve?

#### Continue antipsychotic medications

McEvoy, J.P., Lieberman, J.A., Perkins, D.O. et al. Efficacy and tolerability of olanzapine, quetiapine and risperidone in the treatment of early psychosis: A randomized, double blind 52 week comparison. *American Journal of Psychiatry*. 164:1050-1060, 2007.

Schooler, N.R. The efficacy and safety of conventional and atypical antipsychotics in first-episode schizophrenia: A review of the literature. *Clinical Schizophrenia and Related Psychoses*. April, 2007.

Kahn, R.S., Fleischhacker, W.W. & Boter, H. Effectiveness of antipsychotic drugs in first-episode schizophrenia and schizophreniform disorder: An open randomized clinical trial. *The Lancet*, 371:1085-1097, 2008.

Noordsy, D.L., Torrey, W.C., Mead, S. et al Recovery-oriented psychopharmacology: Redefining the goals of antipsychotic treatment. *Journal of Clinical Psychiatry*. 61(Suppl 3): 22-28, 2000.

Editorial consensus.

#### Adjust antipsychotic medications

Essock, S.M., Covell, N.H., Davis, S.M., et al Effectiveness of switching antipsychotic medications. *American Journal of Psychiatry*. 163(12):2090-2095, 2006.

Mukundan, A., G., Faulkner, T., Cohn, & G. Remington. Can changing antipsychotic medication improve side effects like increases in weight, blood sugar and cholesterol? *Cochrane Review*, 2008

Uchida, H., Suzuki, T., Takeuchi, H., Arenovich, T. & Mamo, D. Low dose vs standard dose of antipsychotics for relapse prevention in schizophrenia: Meta-analysis. *Schizophrenia Bulletin*, 37(4):788-799, 2009.

Buchanan, R., Kreyenbuhl, J. et al The 2009 schizophrenia PORT psychopharmacological treatment recommendations and summary statements. [Schizophrenia Bulletin](#). 36(1):71-93, 2010.

McGorry, P., Alvarez-Jimenez, M. & Killackey, E. Antipsychotic medication during the critical period following remission from first-episode psychosis. *Journal of the American Medical Association – Psychiatry*, 70(9):898-900, 2013.

Robinson, D.G., Schooler, N.R. & Majnu, J. Prescription practices in the treatment of first episode schizophrenia spectrum disorders: Data from the national RAISE-ETP study. *American Journal of Psychiatry*, 172:237-248, 2015.

Dixon L., & Stroup, T. Medications for first episode psychosis: Making a good start. *American Journal of Psychiatry*, 172(3):209-211, 2015.

Cerovecki, A., Musil, R., Klimke, A. et al. Withdrawal symptoms and rebound syndromes associated with switching and discontinuing atypical antipsychotics: Theoretical background and practical recommendations. *CNS Drugs*, 27(7):545-572, 2013.

Moore, T.A., Buchanan, R.W. & Buckley, P.F. The Texas medication algorithm project Antipsychotic algorithm for schizophrenia: 2006 update. *Journal of Clinical Psychiatry*, 68(11):1751-1762, 2006.

Fraser, R., Berger, G., Killackey, E. & McGorry, P. Emerging psychosis in young people – part 3. *Australian Family Physician*, 35(5):329-332, 2006.

### **Stop antipsychotic medications**

Hogan, D. Strategies for discontinuing psychotropic medications. *Canadian Geriatric Society Journal of CME*, 4(2):14-18, 2014.

Harrow, M., Jobe, T.H., & Faull, R.N. Do all schizophrenia patients need antipsychotic treatment continuously throughout their lifetime? A 20 year longitudinal study. *Psychological Medicine*, 42: 2145-2155, 2012.

Fraser, R., Berger, G., Killackey, E. & McGorry, P. Emerging psychosis in young people – part 3. *Australian Family Physician*, 35(5): 329-332, 2006.

Saloman, C. & Hamilton, B. Antipsychotic discontinuation syndromes: A narrative review of the evidence and its integration into Australian mental health nursing textbooks. *International Journal of Mental Health Nursing*, 23:69-78, 2014.

Muesser, K.T., Corrigan, P.W., Hilton, D.W. et al. Illness management and recovery: A review of the research. *Psychiatric Services*, 53(10):1272-1284, 2002

### **What are the benefits?**

### **Continue antipsychotic medications**

Leucht, S., Tardy, M., Komossa, K., et al Maintenance treatment with antipsychotic drugs for schizophrenia. *The Cochrane Library* (2012). <http://www.cochrane.org/CD0080...>

Karson, C., Duffy, R.A., Eramo, A., Nylander, A.G. & Offord, S.J. Long-term outcomes of antipsychotic treatment in patients with first-episode schizophrenia: A systematic review. *Neuropsychiatric Disease and Treatment*, 12:57-67, 2016.

Mizrahi, R., Bagby, R.M., Zipursky, R.B. and Kapur, S. How antipsychotics work: The patients perspective. *Neuro-Psychopharmacology & Biological Psychiatry*, 29, 859-864, 2005.

Editorial consensus.

**Editors:** David Shern, Glyn Elwyn, Julie Kreyenbuhl, Robert Drake, Patricia Deegan, Lisa Dixon, Anthony Lehman, William Torrey, Manish Mishra, Yaara Zisman-Ilani

**ISBN:** 978-1-941487-17-4

**License:** CC BY-NC-ND 4.0 (International)

**More information:** <http://optiongrid.org>

## **Adjust antipsychotic medications**

McEvoy, J.P., Lieberman, J.A., Perkins, D.O. et al Efficacy and tolerability of olanzapine, quetiapine and risperidone in the treatment of early psychosis: A randomized, double blind 52 week comparison. *American Journal of Psychiatry*, 164:1050-1060, 2007.

Viguera, A., Baldessarini, R., Hegarty, J., van Kammen, D. & Tohen, M. Clinical risk following abrupt and gradual withdrawal of maintenance neuroleptic treatment. *Archives of General Psychiatry*, 54(1):49-55, 1997.

Schooler, N.R. The efficacy and safety of conventional and atypical antipsychotics in first-episode schizophrenia: A review of the literature. *Clinical Schizophrenia and Related Psychoses*, 1(1):27-42, 2007.

Leucht, S., Tardy, M., Komossa, K. et al. Antipsychotic drugs versus placebo for relapse prevention in schizophrenia: A systematic review and meta-analysis, *The Lancet*, 379:2063-2071, 2012.

Buchanan, R., Kreyenbuhl, J. et al. The 2009 schizophrenia PORT psychopharmacological treatment recommendations and summary statements. *Schizophrenia Bulletin* 36(1):71-93 2010.

Bruijnzeel, D., Suryadevara, U. & Tandon, R. Antipsychotic treatment of schizophrenia: An update. *Asian Journal of Psychiatry*, 11:3-7, 2014.

## **Stop antipsychotic medications**

McEvoy, J.P., Lieberman, J.A., Perkins, D.O. et al Efficacy and tolerability of olanzapine, quetiapine and risperidone in the treatment of early psychosis: A randomized, double blind 52 week comparison. *American Journal of Psychiatry*, 164, 1050-1060, 2007.

Viguera, A., Baldessarini, R., Hegarty, J., van Kammen, D. & Tohen, M. Clinical risk following abrupt and gradual withdrawal of maintenance neuroleptic treatment. *Archives of General Psychiatry*, 54(1):49-55, 1997.

Schooler, N.R. The efficacy and safety of conventional and atypical antipsychotics in first-episode schizophrenia: A review of the literature. *Clinical Schizophrenia and Related Psychoses*, 1(1):27-42, 2007.

Leucht, S., Tardy, M., Komossa, K. et al. Antipsychotic drugs versus placebo for relapse prevention in schizophrenia: A systematic review and meta-analysis, *The Lancet*, 379: 2063-2071, 2012.

Buchanan, R., Kreyenbuhl, J. et al The 2009 schizophrenia PORT psychopharmacological treatment recommendations and summary statements. *Schizophrenia Bulletin* 36(1):71-93 2010.

Bruijnzeel, D., Suryadevara, U. & Tandon, R. Antipsychotic treatment of schizophrenia: An update. *Asian Journal of Psychiatry*, 11:3-7, 2014.

## **What are the risks?**

**Editors:** David Shern, Glyn Elwyn, Julie Kreyenbuhl, Robert Drake, Patricia Deegan, Lisa Dixon, Anthony Lehman, William Torrey, Manish Mishra, Yaara Zisman-Ilani

**ISBN:** 978-1-941487-17-4

**License:** CC BY-NC-ND 4.0 (International)

**More information:** <http://optiongrid.org>

## **Continue antipsychotic medications**

McEvoy, J.P., Lieberman, J.A., Perkins, D.O. et al Efficacy and tolerability of olanzapine, quetiapine and risperidone in the treatment of early psychosis: A randomized, double blind 52 week comparison. *American Journal of Psychiatry*, 164:1050-1060, 2007.

Viguera, A., Baldessarini, R., Hegarty, J., van Kammen, D. & Tohen, M. Clinical risk following abrupt and gradual withdrawal of maintenance neuroleptic treatment. *Archives of General Psychiatry*, 54(1):49-55, 1997.

Schooler, N.R. The efficacy and safety of conventional and atypical antipsychotics in first-episode schizophrenia: A review of the literature. *Clinical Schizophrenia and Related Psychoses*, 1(1):27-42, 2007

Leucht, S., Tardy, M., Komossa, K., Heres, S., Kissling, W., Salanti, G. et al. Antipsychotic drugs versus placebo for relapse prevention in schizophrenia: A systematic review and meta-analysis, *The Lancet*, 379:2063-2071, 2012.

Buchanan, R., Kreyenbuhl, J. et al The 2009 schizophrenia PORT psychopharmacological treatment recommendations and summary statements. *Schizophrenia Bulletin*. 36(1):71-93, 2010.

Bruijnzeel, D., Suryadevara, U. & Tandon, R. Antipsychotic treatment of schizophrenia: An update. *Asian Journal of Psychiatry*, 11:3-7, 2014.

Smith, S., O'keane, V., & Murray, R.. Sexual dysfunction in patients taking conventional antipsychotic medication. *The British Journal of Psychiatry*, 181(1):49-55, 2002.

Montejo, Á. L., Majadas, S., Rico&dash;Villademoros, F. et al Frequency of sexual dysfunction in patients with a psychotic disorder receiving antipsychotics. *The Journal of Sexual Medicine*, 7(10): 3404-3413, 2010.

Robinson, D.G., Schooler, N.R. & Majnu, J. Prescription practices in the treatment of first episode schizophrenia spectrum disorders: Data from the national RAISE-ETP study. *American Journal of Psychiatry*, 172:237-248, 2015.

Essock, S.M., Covell, N.H., Leckman-Westin, E. et al. Identifying clinically questionable psychotropic prescribing practices for Medicaid recipients in New York state. *Psychiatric Services*, 60(12):1595-1602, 2009.

Uchida, H., Suzuki, T., Takeuchi, H., Arenovich, T. & Mamo, D. Low dose vs standard dose of antipsychotics for relapse prevention in schizophrenia: Meta-analysis. *Schizophrenia Bulletin*, 37(4):788-799, 2011

## **Adjust antipsychotic medications**

Viguera, A., Baldessarini, R., Hegarty, J., van Kammen, D. & Tohen, M. Clinical risk following abrupt and gradual withdrawal of maintenance neuroleptic treatment. *Archives of General Psychiatry*, 54(1):49-55, 1997.

Mukundan, A., G. Faulkner, T. Cohn, & G. Remington. Can changing antipsychotic medication improve side effects like increases in weight, blood sugar and cholesterol? *Cochrane Review*,

**Editors:** David Shern, Glyn Elwyn, Julie Kreyenbuhl, Robert Drake, Patricia Deegan, Lisa Dixon, Anthony Lehman, William Torrey, Manish Mishra, Yaara Zisman-Ilani

**ISBN:** 978-1-941487-17-4

**License:** CC BY-NC-ND 4.0 (International)

**More information:** <http://optiongrid.org>

2008.

[http://www.cochrane.org/CD006629/SCHIZ\\_can-changing-antipsychotic-medication-improve-side-effects-like-increases-in-weight-blood-sugar-and-cholesterol](http://www.cochrane.org/CD006629/SCHIZ_can-changing-antipsychotic-medication-improve-side-effects-like-increases-in-weight-blood-sugar-and-cholesterol)

Kam, S.M., Singh, S.P. & Upthegrove, R. What needs to follow early intervention? Predictors of relapse and functional recovery following first-episode psychosis. *Early Intervention in Psychiatry*, 9:279-283, 2015.

Karson, C., Duffy, R.A., Eramo, A., Nylander, A.G. & Offord, S.J. Long-term outcomes of antipsychotic treatment in patients with first-episode schizophrenia: A systematic review. *Neuropsychiatric Disease and Treatment*, 12:57-67, 2016.

Fraser, R., Berger, G., Killackey, E. & McGorry, P. Emerging psychosis in young people – part 3. *Australian Family Physician*, 35(5):329-332, 2006.

### **Stop antipsychotic medications**

Viguera, A., Baldessarini, R., Hegarty, J., van Kammen, D. & Tohen, M. Clinical risk following abrupt and gradual withdrawal of maintenance neuroleptic treatment. *Archives of General Psychiatry*, 54(1):49-55, 1997.

Mukundan, A., G. Faulkner, T. Cohn, & G. Remington. Can changing antipsychotic medication improve side effects like increases in weight, blood sugar and cholesterol? *Health Cochrane Review*, 2008.

[http://www.cochrane.org/CD006629/SCHIZ\\_can-changing-antipsychotic-medication-improve-side-effects-like-increases-in-weight-blood-sugar-and-cholesterol](http://www.cochrane.org/CD006629/SCHIZ_can-changing-antipsychotic-medication-improve-side-effects-like-increases-in-weight-blood-sugar-and-cholesterol)

Zipursky, R., Menezes, N. & Streiner, D. Risk of symptom recurrence with medication discontinuation in first-episode psychosis: A systematic review. *Schizophrenia Research*, 152:408-414, 2014.

### **How can I lower the risks?**

#### **Continue antipsychotic medications**

NICE Clinical Guideline CG178: Psychosis and schizophrenia in adults: treatment and management, 2014 - 7.2.8.1

Norman, R.M., Malia, A.K., Manchanda, R. et al Social support and three year symptom and admission outcomes for first episode psychosis. *Schizophrenia Research*, 80(2-3):227-234, 2005.

Lewis, L. The role of mental health patient organizations in disease management. *Practical Disease Management*, 9(11):607-617, 2001.

Stone, J.M., Fisher, H.L., Major, B. et al. Cannabis use and first-episode psychosis: Relationship with manic and psychotic symptoms, and with age at presentation. *Psychological Medicine*, 44(3):499-506 2014.

Faridi, K., Joober, R. & Malla, A. Medication adherence mediates the impact of sustained cannabis use on

**Editors:** David Shern, Glyn Elwyn, Julie Kreyenbuhl, Robert Drake, Patricia Deegan, Lisa Dixon, Anthony Lehman, William Torrey, Manish Mishra, Yaara Zisman-Ilani

**ISBN:** 978-1-941487-17-4

**License:** CC BY-NC-ND 4.0 (International)

**More information:** <http://optiongrid.org>

symptom levels in first episode psychosis. *Schizophrenia Research*, 141:78-82, 2012.

Mueser, K., Gingerich, S. Treatment of co-occurring psychotic and substance use disorders. *Social Work Public Health*, 28(3-4):424-39. 2013, doi: 10.1080/19371918.2013.774676.

Sheidow, A., McCart, M., Zajac, K. & Davis, M. Prevalence and impact of substance use among emerging adults with serious mental health conditions. *Psychiatric Rehabilitation Journal*, 35(3):235-43, 2012.

### **Adjust antipsychotic medications**

Noordsy, D.L., Torrey, W.C., Mead, S. et al Recovery-oriented psychopharmacology: Redefining the goals of antipsychotic treatment. *Journal of Clinical Psychiatry*. 61(Suppl 3):22-28, 2000.

NICE Clinical Guideline CG178: Psychosis and schizophrenia in adults: treatment and management, 2014 8.5.1.2

van der Krieke, L., Emerencia, A. C., Boonstra, N., et al. A web-based tool to support shared decision making for people with a psychotic disorder: randomized controlled trial and process evaluation. *Journal of Medical Internet Research*, 15(10), e216, 2013.

Mueser K.T. & Gingerich S. Illness self-management programmes. In: Thornicroft, G., Szumukler, G., Mueser K. & Drake R.(eds) *Oxford Textbook of Community Mental Health*, Oxford: Oxford University Press, 2011.

Stone, J.M., Fisher, H.L., Major, B. et al. Cannabis use and first-episode psychosis: Relationship with manic and psychotic symptoms, and with age at presentation. *Psychological Medicine*, 44(3):499-506 2014.

Faridi, K., Joober, R. & Malla, A. Medication adherence mediates the impact of sustained cannabis use on symptom levels in first episode psychosis. *Schizophrenia Research*, 141:78-82, 2012.

Mueser, K., Gingerich, S. Treatment of co-occurring psychotic and substance use disorders. *Social Work Public Health*, 28(3-4):424-39. 2013, doi: 10.1080/19371918.2013.774676.

Sheidow, A., McCart, M., Zajac, K. & Davis, M. Prevalence and impact of substance use among emerging adults with serious mental health conditions. *Psychiatric Rehabilitation Journal*, 35(3):235-43, 2012.

Editorial consensus.

### **Stop antipsychotic medications**

Fraser, R., Berger, G., Killackey, E. & McGorry, P. Emerging psychosis in young people – part 3. *Australian Family Physician*, 35(5), 329-332, 2006.

Saloman, C. & Hamilton, B. Antipsychotic discontinuation syndromes: A narrative review of the evidence and its integration into Australian mental health nursing textbooks. *International Journal of Mental Health Nursing*, 23:69-78, 2014.

Muesser, K.T., Corrigan, P.W., Hilton, D.W. et al Illness management and recovery: A review of the research.

**Editors:** David Shern, Glyn Elwyn, Julie Kreyenbuhl, Robert Drake, Patricia Deegan, Lisa Dixon, Anthony Lehman, William Torrey, Manish Mishra, Yaara Zisman-Ilani

**ISBN:** 978-1-941487-17-4

**License:** CC BY-NC-ND 4.0 (International)

**More information:** <http://optiongrid.org>

Psychiatric Services, 53(10), 1272-1284, 2002.

Stone, J.M., Fisher, H.L., Major, B. et al. Cannabis use and first-episode psychosis: Relationship with manic and psychotic symptoms, and with age at presentation. *Psychological Medicine*, 44(3):499-506 2014.

Faridi, K., Joobar, R. & Malla, A. Medication adherence mediates the impact of sustained cannabis use on symptom levels in first episode psychosis. *Schizophrenia Research*, 141:78-82, 2012.

Mueser, K., Gingerich, S. Treatment of co-occurring psychotic and substance use disorders. *Social Work Public Health*, 28(3-4):424-39. 2013, doi: 10.1080/19371918.2013.774676.

Sheidow, A., McCart, M., Zajac, K. & Davis, M. Prevalence and impact of substance use among emerging adults with serious mental health conditions. *Psychiatric Rehabilitation Journal*, 35(3):235-43, 2012.

Editorial consensus.

### **How might this affect my usual activities?**

#### **Continue antipsychotic medications**

Harrow, M., Grossman, L., Jobe, T. & Herbener, E. Do patients with schizophrenia ever show periods of recovery? A 15 year multi-follow-up study. *Schizophrenia Bulletin*, 31(3):2145-2155, 2005.

#### **Adjust antipsychotic medications**

Uchida, H., Suzuki, T., Takeuchi, H., Arenovich, T. & Mamo, D. Low dose vs standard dose of antipsychotics for relapse prevention in schizophrenia: Meta-analysis. *Schizophrenia Bulletin*, 37(4):788-799, 2009.

Buchanan, R., Kreyenbuhl, J. et al The 2009 schizophrenia PORT psychopharmacological treatment recommendations and summary statements. *Schizophrenia Bulletin*, 36(1):71-93, 2010.

Wunderink, L., Nieboer, R, Wiersma, D., Sytema, S. & Nienhuis, F. Recovery in remitted first episode psychosis at 7 years of follow-up of an early dose reduction/discontinuation or maintenance treatment strategy. *Journal of the American Medical Association - Psychiatry*, 70(9):913-920, 2013.

#### **Stop antipsychotic medications**

Wunderink, L., Nieboer, R, Wiersma, D., Sytema, S. & Nienhuis, F. Recovery in remitted first episode psychosis at 7 years of follow-up of an early dose reduction/discontinuation or maintenance treatment strategy. *Journal of the American Medical Association - Psychiatry*, 70(9):913-920, 2013.

Viguera, A., Baldessarini, R., Hegarty, J., van Kammen, D. & Tohen, M. Clinical risk following abrupt and gradual withdrawal of maintenance neuroleptic treatment. *Archives of General Psychiatry*, 54(1):49-55, 1997.

Zipursky, R., Menezes, N. & Streiner, D. Risk of symptom recurrence with medication discontinuation in first-

**Editors:** David Shern, Glyn Elwyn, Julie Kreyenbuhl, Robert Drake, Patricia Deegan, Lisa Dixon, Anthony Lehman, William Torrey, Manish Mishra, Yaara Zisman-Ilani

**ISBN:** 978-1-941487-17-4

**License:** CC BY-NC-ND 4.0 (International)

**More information:** <http://optiongrid.org>

episode psychosis: A systematic review. *Schizophrenia Research*,152:408-414, 2014.

Fraser, R., Berger, G., Killackey, E. & McGorry, P. Emerging psychosis in young people – part 3. *Australian Family Physician*, 35(5):329-332, 2006.

Saloman, C. & Hamilton, B. Antipsychotic discontinuation syndromes: A narrative review of the evidence and its integration into Australian mental health nursing textbooks. *International Journal of Mental Health Nursing*, 23:69-78, 2014.

Editorial consensus.
